# Supplementary material
Source: Springer Nature journal article supplement (https://www.springermedizin.de/resource/supplementary/12913_2011_1931_MOESM2_ESM.pdf/9530084)

# How effective is screening mammography in reducing breast cancer mortality?

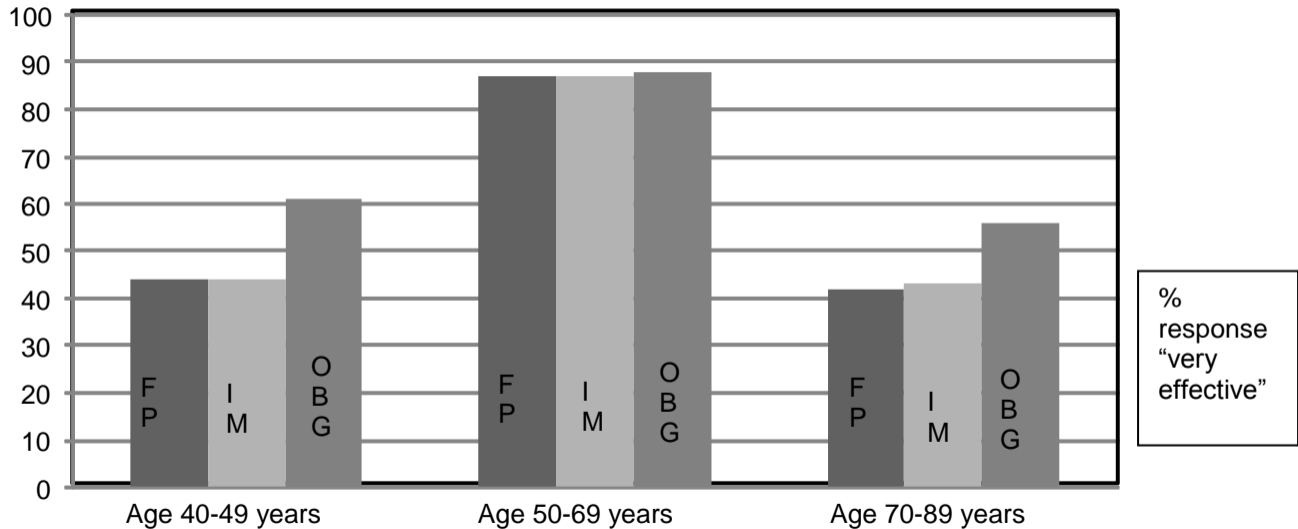

Supplement: MOESM2 [file 9530084]
